# Supplementary material for: A Systematic Analysis of Eluted Fraction of Plasma Post Immunoaffinity Depletion: Implications in Biomarker Discovery
Source: PLoS One. 2011 Sep 7;6(9):e24442. doi: 10.1371/journal.pone.0024442 (PMC3168506; doi:10.1371/journal.pone.0024442)
Supplement: Spreadsheet S1 — List of manually validated peptides for single peptide hit proteins, their raw spectral counts and algorithms that identified the peptides. (XLSX) [file pone.0024442.s005.xlsx]

## Sheet: SpectralCounts
IPI ID	Sample	PEPTIDE	Description	Shared Peptides	Unique Peptides	IPI ID	Protein Length	Sequence Coverage(%)	MassWiz	X!Tandem	OMSSA	SEQUEST	Total Spectra	MassWiz Count	Xtandem Count	OMSSA Count	SEEQUEST COUNT	Total Algo
IPI00219713.1	A634	DNCCILDER	FGG Isoform Gamma-A of Fibrinogen gamma chain	1	0	IPI00219713.1	437	56.75	13	12	15	9	15	1	1	1	1	4		1 means present
IPI00873899.1	A634	FAALDNEEEDK	ABCF1 Isoform 1 of ATP-binding cassette sub-family F member 1	1	0	IPI00873899.1	845	1.3	0	14	1	3	14	0	1	1	1	3		0 means absent
IPI00925214.1	A634	AGADTHGRLLQGNICNDAVTK	CASP12 Putative uncharacterized protein CASP12	0	1	IPI00925214.1	277	7.58	1	12	0	10	13	1	1	0	1	3
IPI00021854.1	A634	SPELQAEAK	APOA2 Apolipoprotein A-II	0	1	IPI00021854.1	100	21	5	10	10	4	12	1	1	1	1	4
IPI00022429.3	A638	EQLGEFYEALDCLR	ORM1 Alpha-1-acid glycoprotein 1	1	0	IPI00022429.3	201	40.8	7	8	8	4	9	1	1	1	1	4
IPI00940393.1	A638	IGGIGTVPVGR	Elongation factor 1-alpha	1	0	IPI00940393.1	395	2.78	7	5	4	5	9	1	1	1	1	4
IPI00298497.3	A638	DNENVVNEYSSELEK	FGB Fibrinogen beta chain	0	1	IPI00298497.3	491	67.82	7	7	7	5	7	1	1	1	1	4
IPI00289838.5	A1441	MVLPEDPKYALK	ESCO1 Isoform 3 of N-acetyltransferase ESCO1	1	0	IPI00289838.5	172	6.98	0	5	3	1	6	0	1	1	1	3
IPI00027252.6	A641	IVQAEGEAEAAK	PHB2 Prohibitin-2	0	1	IPI00027252.6	299	4.01	5	4	5	5	5	1	1	1	1	4
IPI00644441.1	A638	ATSSPMLYEVVYEAGALER	CREB3L4 cAMP responsive element binding protein 3-like 4	1	0	IPI00644441.1	228	8.33	5	2	4	0	5	1	1	1	0	3
IPI00021857.1	A634	DALSSVQESQVAQQAR	APOC3 Apolipoprotein C-III	1	0	IPI00021857.1	99	16.16	5	4	5	2	5	1	1	1	1	4
IPI00916229.1	A638	FVIGGPQGDAGLTGR	MAT2A S-adenosylmethionine synthetase	1	0	IPI00916229.1	299	5.02	3	4	4	4	4	1	1	1	1	4
IPI00022420.3	S2034	LIVHNGYCDGR	RBP4 Retinol-binding protein 4	1	0	IPI00022420.3	201	5.47	2	2	3	0	3	1	1	1	0	3
IPI00001310.8	A641	STPRRNELDHYAVIK	18 kDa protein	0	1	IPI00001310.8	155	9.68	1	0	3	0	3	1	0	1	0	2
IPI00892693.1	A638	ENPVKGSPGVPSFAAGPPISEGK	CDSN Corneodesmosin	1	0	IPI00892693.1	529	4.35	2	1	3	0	3	1	1	1	0	3
IPI00185361.6	A634	ALEVLVK	DDX55 ATP-dependent RNA helicase DDX55	1	0	IPI00185361.6	600	1.17	1	2	0	0	3	1	1	0	0	2
IPI00288940.6	A1438	FIEDVK	OBSCN Isoform 1 of Obscurin	1	0	IPI00288940.6	7968	0.08	3	0	0	1	3	1	0	0	1	2
IPI00164776.2	S2038	MPGTVATLR	TMEM198 Transmembrane protein 198	1	0	IPI00164776.2	360	2.5	0	1	1	1	2	0	1	1	1	3
IPI00219018.7	S2038	GALQNIIPASTGAAK	GAPDH Glyceraldehyde-3-phosphate dehydrogenase	1	0	IPI00219018.7	335	4.48	1	2	2	1	2	1	1	1	1	4
IPI00797400.1	S2038	TITLEVEPSDTIENVK	UBB;RPS27A;UBC 19 kDa protein	1	0	IPI00797400.1	167	9.58	0	1	0	2	2	0	1	0	1	2
IPI00029739.5	S2034	DTSCVNPPTVQNAYIVSR	CFH Isoform 1 of Complement factor H	0	1	IPI00029739.5	1231	1.46	2	1	2	1	2	1	1	1	1	4
IPI00032220.3	S2034	ALQDQLVLVAAK	AGT Angiotensinogen	1	0	IPI00032220.3	485	2.47	1	2	2	2	2	1	1	1	1	4
IPI00845229.1	S2034	YIMQATDVMRKQVGLMQTWE	PREX2 Isoform 2 of Phosphatidylinositol 3;4;5-trisphosphate-dependent Rac exchanger 2 protein	0	1	IPI00845229.1	1504	1.33	1	0	2	1	2	1	0	1	1	3
IPI00942458.1	S2034	VMQPLVQQPILPVVK	RBM26 Isoform 1 of RNA-binding protein 26	1	0	IPI00942458.1	1007	1.49	1	0	2	0	2	1	0	1	0	2
IPI00019038.1	A638	STDYGIFQINSR	LYZ Lysozyme C	0	1	IPI00019038.1	148	8.11	2	2	2	2	2	1	1	1	1	4
IPI00292530.1	S2041	AAISGENAGLVR	ITIH1 Inter-alpha-trypsin inhibitor heavy chain H1	1	0	IPI00292530.1	911	1.32	1	1	1	1	1	1	1	1	1	4
IPI00013885.1	S2038	MAEAELVQEGK	CASP14 Caspase-14	0	1	IPI00013885.1	242	4.55	1	0	1	1	1	1	0	1	1	3
IPI00021536.2	S2038	AFSAVDTDGNGTINAQELGAALK	CALML5 Calmodulin-like protein 5	0	1	IPI00021536.2	146	15.75	1	1	1	1	1	1	1	1	1	4
IPI00026256.2	S2038	HHEAASWADSSR	FLG Filaggrin	0	1	IPI00026256.2	4061	0.3	1	0	1	0	1	1	0	1	0	2
IPI00032325.1	S2038	TQVVAGTNYYIK	CSTA Cystatin-A	1	0	IPI00032325.1	98	12.24	1	1	1	1	1	1	1	1	1	4
IPI00219806.7	S2038	GTNYLADVFEK	S100A7 Protein S100-A7	0	1	IPI00219806.7	101	10.89	1	1	1	1	1	1	1	1	1	4
IPI00879231.1	S2038	LCQDLGPGAFR	SERPINF2 Alpha-2-antiplasmin	1	0	IPI00879231.1	491	2.24	1	1	1	1	1	1	1	1	1	4
IPI00942197.2	S2038	VGEAAHALGNTGHEIGR	DMKN 40 kDa protein	1	0	IPI00942197.2	416	4.09	1	1	1	1	1	1	1	1	1	4
IPI00021855.1	S2034	LKEFGNTLEDK	APOC1 Apolipoprotein C-I	0	1	IPI00021855.1	83	13.25	1	1	1	0	1	1	1	1	0	3
IPI00218914.5	S2034	IFVEESIYDEFVR	ALDH1A1 Retinal dehydrogenase 1	1	0	IPI00218914.5	501	2.59	1	0	1	1	1	1	0	1	1	3
IPI00298828.3	S2034	TCPKPDDLPFSTVVPLK	APOH Beta-2-glycoprotein 1	1	0	IPI00298828.3	345	4.93	1	1	1	0	1	1	1	1	0	3
IPI00784154.1	S2034	KPLVIIAEDVDGEALSTLVLNR	HSPD1 60 kDa heat shock protein; mitochondrial	1	0	IPI00784154.1	573	3.84	1	1	1	0	1	1	1	1	0	3
IPI00307466.2	A638	FKVEESYDLKDTLR	SERPINB3 Isoform 2 of Serpin B3	1	0	IPI00307466.2	338	7.1	1	1	1	0	1	1	1	1	0	3
IPI00946754.1	A634	VLEGNEQFINAAK	PRSS1 Protease serine 1	1	0	IPI00946754.1	142	9.15	1	1	1	1	1	1	1	1	1	4
IPI00915753.1	A1441	IQDLETENMELK	GULP1 Putative uncharacterized protein GULP1	1	0	IPI00915753.1	291	4.12	1	0	1	0	1	1	0	1	0	2
IPI00020101.9	A1438	AMGIMNSFVNDIFER	HIST1H2BE;HIST1H2BC;HIST1H2BI;HIST1H2BG;HIST1H2BF Histone H2B type 1-C/E/F/G/I	1	0	IPI00020101.9	126	11.9	1	1	1	0	1	1	1	1	0	3
IPI00025094.3	A1438	DLIDQLGEGGR	MYH16 cDNA: FLJ22037 fis; clone HEP08868 (Fragment)	0	1	IPI00025094.3	746	1.47	1	1	1	1	1	1	1	1	1	4
IPI00152871.1	A1438	ASQVECTGAR	LRRC15 Leucine-rich repeat-containing protein 15	1	0	IPI00152871.1	581	1.72	1	1	1	0	1	1	1	1	0	3
IPI00218390.1	A1438	VTTVIQNPMPIR	CD22 Isoform CD22-alpha of B-cell receptor CD22	1	0	IPI00218390.1	670	1.79	1	0	1	0	1	1	0	1	0	2
IPI00021033.2	A1434	GPVGPSGPPGK	COL3A1 Isoform 1 of Collagen alpha-1(III) chain	0	1	IPI00021033.2	1466	0.75	1	1	1	0	1	1	1	1	0	3
IPI00654888.4	A1434	GVNVCQETCTK	KLKB1 Plasma kallikrein	1	0	IPI00654888.4	638	1.72	1	1	0	0	1	1	1	0	0	2

## Sheet: SinglepeptideHits-ManualValidat
IPI ID	Sample	PEPTIDE	Description	Total Peptides	Shared Peptides	Unique Peptides	Group No.	Representative	A634	A638	A641	A1434	A1438	A1441	S2034	S2038	S2041	Total	Total34	Total38	Total41	IPI ID	Length	Sequence Coverage(%)
IPI00292530.1	S2041	AAISGENAGLVR	ITIH1 Inter-alpha-trypsin inhibitor heavy chain H1	1	1	0	Group 68	Grp representative									1	1	0	0	1	IPI00292530.1	911	1.32	1
IPI00013885.1	S2038	MAEAELVQEGK	CASP14 Caspase-14	1	0	1	Group 30	Grp representative	0	0	0	0	0	0	0	1	0	1	0	1	0	IPI00013885.1	242	4.55	1
IPI00021536.2	S2038	AFSAVDTDGNGTINAQELGAALK	CALML5 Calmodulin-like protein 5	1	0	1	Group 31	Grp representative	0	0	0	0	0	0	0	1	0	1	0	1	0	IPI00021536.2	146	15.75	1
IPI00026256.2	S2038	HHEAASWADSSR	FLG Filaggrin	1	0	1	Group 26	Grp representative	0	0	0	0	0	0	0	1	0	1	0	1	0	IPI00026256.2	4061	0.3	1
IPI00032325.1	S2038	TQVVAGTNYYIK	CSTA Cystatin-A	1	1	0	Group 103		0	0	0	0	0	0	0	1	0	1	0	1	0	IPI00032325.1	98	12.24	1
IPI00164776.2	S2038	MPGTVATLR	TMEM198 Transmembrane protein 198	1	1	0	Group 94	Grp representative								1		1	0	1	0	IPI00164776.2	360	2.5	1
IPI00219018.7	S2038	GALQNIIPASTGAAK	GAPDH Glyceraldehyde-3-phosphate dehydrogenase	1	1	0	Group 88	Grp representative	0	0	0	0	0	0	0	1	0	1	0	1	0	IPI00219018.7	335	4.48	1
IPI00219806.7	S2038	GTNYLADVFEK	S100A7 Protein S100-A7	1	0	1	Group 25	Grp representative								1		1	0	1	0	IPI00219806.7	101	10.89	1
IPI00797400.1	S2038	TITLEVEPSDTIENVK	UBB;RPS27A;UBC 19 kDa protein	1	1	0	Group 87	Grp representative	0	0	0	0	0	0	0	1	0	1	0	1	0	IPI00797400.1	167	9.58	1
IPI00879231.1	S2038	LCQDLGPGAFR	SERPINF2 Alpha-2-antiplasmin	1	1	0	Group 90									1		1	0	1	0	IPI00879231.1	491	2.24	1
IPI00942197.2	S2038	VGEAAHALGNTGHEIGR	DMKN 40 kDa protein	1	1	0	Group 91		0	0	0	0	0	0	0	1	0	1	0	1	0	IPI00942197.2	416	4.09	1
IPI00021855.1	S2034	LKEFGNTLEDK	APOC1 Apolipoprotein C-I	1	0	1	Group 33	Grp representative	0	0	0	0	0	0	1	0	0	1	1	0	0	IPI00021855.1	83	13.25	1
IPI00022420.3	S2034	LIVHNGYCDGR	RBP4 Retinol-binding protein 4	1	1	0	Group 88	Grp representative							1			1	1	0	0	IPI00022420.3	201	5.47	1
IPI00029739.5	S2034	DTSCVNPPTVQNAYIVSR	CFH Isoform 1 of Complement factor H	1	0	1	Group 32	Grp representative	0	0	0	1	0	0	1	0	0	2	2	0	0	IPI00029739.5	1231	1.46	1
IPI00032220.3	S2034	ALQDQLVLVAAK	AGT Angiotensinogen	1	1	0	Group 92	Grp representative	0	0	0	0	0	0	1	1	0	2	1	1	0	IPI00032220.3	485	2.47	1
IPI00218914.5	S2034	IFVEESIYDEFVR	ALDH1A1 Retinal dehydrogenase 1	1	1	0	Group 96	Grp representative	0	0	0	0	0	0	1	0	0	1	1	0	0	IPI00218914.5	501	2.59	1
IPI00298828.3	S2034	TCPKPDDLPFSTVVPLK	APOH Beta-2-glycoprotein 1	1	1	0	Group 77	Grp representative	0	0	0	0	0	0	1	0	0	1	1	0	0	IPI00298828.3	345	4.93	1
IPI00784154.1	S2034	KPLVIIAEDVDGEALSTLVLNR	HSPD1 60 kDa heat shock protein; mitochondrial	1	1	0	Group 91								1			1	1	0	0	IPI00784154.1	573	3.84	1
IPI00845229.1	S2034	YIMQATDVMRKQVGLMQTWE	PREX2 Isoform 2 of Phosphatidylinositol 3;4;5-trisphosphate-dependent Rac exchanger 2 protein	1	0	1	Group 24	Grp representative							1		1	2	1	0	1	IPI00845229.1	1504	1.33	1
IPI00942458.1	S2034	VMQPLVQQPILPVVK	RBM26 Isoform 1 of RNA-binding protein 26	1	1	0	Group 89	Grp representative							1			1	1	0	0	IPI00942458.1	1007	1.49	1
IPI00001310.8	A641	STPRRNELDHYAVIK	18 kDa protein	1	0	1	Group 10	Grp representative	0	0	1	0	0	0	0	0	0	1	0	0	1	IPI00001310.8	155	9.68	1
IPI00027252.6	A641	IVQAEGEAEAAK	PHB2 Prohibitin-2	1	0	1	Group 11	Grp representative			1							1	0	0	1	IPI00027252.6	299	4.01	1
IPI00019038.1	A638	STDYGIFQINSR	LYZ Lysozyme C	1	0	1	Group 16	Grp representative	0	1	0	0	0	0	0	1	0	2	0	2	0	IPI00019038.1	148	8.11	1
IPI00022429.3	A638	EQLGEFYEALDCLR	ORM1 Alpha-1-acid glycoprotein 1	1	1	0	Group 63	Grp representative		1								1	0	1	0	IPI00022429.3	201	40.8	1
IPI00298497.3	A638	DNENVVNEYSSELEK	FGB Fibrinogen beta chain	1	0	1	Group 17	Grp representative	0	1	0	0	0	0	0	0	0	1	0	1	0	IPI00298497.3	491	67.82	1
IPI00307466.2	A638	FKVEESYDLKDTLR	SERPINB3 Isoform 2 of Serpin B3	1	1	0	Group 62	Grp representative		1						1		2	0	2	0	IPI00307466.2	338	7.1	1
IPI00644441.1	A638	ATSSPMLYEVVYEAGALER	CREB3L4 cAMP responsive element binding protein 3-like 4	1	1	0	Group 58	Grp representative	0	1	0	1	0	0	0	0	0	2	1	1	0	IPI00644441.1	228	8.33	1
IPI00892693.1	A638	ENPVKGSPGVPSFAAGPPISEGK	CDSN Corneodesmosin	1	1	0	Group 55		0	1	0	0	0	0	0	0	0	1	0	1	0	IPI00892693.1	529	4.35	1
IPI00916229.1	A638	FVIGGPQGDAGLTGR	MAT2A S-adenosylmethionine synthetase	1	1	0	Group 68	Grp representative		1				1	1			3	1	1	1	IPI00916229.1	299	5.02	1
IPI00940393.1	A638	IGGIGTVPVGR	Elongation factor 1-alpha	1	1	0	Group 57		0	1	0	0	1	1	1	0	0	4	1	2	1	IPI00940393.1	395	2.78	1
IPI00021854.1	A634	SPELQAEAK	APOA2 Apolipoprotein A-II	1	0	1	Group 12	Grp representative	1	0	1	0	0	0	0	0	0	2	1	0	1	IPI00021854.1	100	21	1
IPI00021857.1	A634	DALSSVQESQVAQQAR	APOC3 Apolipoprotein C-III	1	1	0	Group 60	Grp representative	1	0	0	1	0	0	1	0	0	3	3	0	0	IPI00021857.1	99	16.16	1
IPI00185361.6	A634	ALEVLVK	DDX55 ATP-dependent RNA helicase DDX55	1	1	0	Group 55	Grp representative	1	0	0	0	0	0	0	0	0	1	1	0	0	IPI00185361.6	600	1.17	1
IPI00219713.1	A634	DNCCILDER	FGG Isoform Gamma-A of Fibrinogen gamma chain	1	1	0	Group 57	Grp representative	1	0	0	0	0	0	0	0	0	1	1	0	0	IPI00219713.1	437	56.75	1
IPI00873899.1	A634	FAALDNEEEDK	ABCF1 Isoform 1 of ATP-binding cassette sub-family F member 1	1	1	0	Group 62	Grp representative	1	0	0	1	0	0	0	0	0	2	2	0	0	IPI00873899.1	845	1.3	1
IPI00925214.1	A634	AGADTHGRLLQGNICNDAVTK	CASP12 Putative uncharacterized protein CASP12	1	0	1	Group 19	Grp representative	1	1	1	1	0	1	1	0	1	7	3	1	3	IPI00925214.1	277	7.58	1
IPI00946754.1	A634	VLEGNEQFINAAK	PRSS1 Protease serine 1	1	1	0	Group 52	Grp representative	1									1	1	0	0	IPI00946754.1	142	9.15	1
IPI00289838.5	A1441	MVLPEDPKYALK	ESCO1 Isoform 3 of N-acetyltransferase ESCO1	1	1	0	Group 71	Grp representative	0	0	0	0	0	1	1	0	1	3	1	0	2	IPI00289838.5	172	6.98	1
IPI00915753.1	A1441	IQDLETENMELK	GULP1 Putative uncharacterized protein GULP1	1	1	0	Group 69	Grp representative	0	0	0	0	0	1	0	0	0	1	0	0	1	IPI00915753.1	291	4.12	1
IPI00020101.9	A1438	AMGIMNSFVNDIFER	HIST1H2BE;HIST1H2BC;HIST1H2BI;HIST1H2BG;HIST1H2BF Histone H2B type 1-C/E/F/G/I	1	1	0	Group 86	Grp representative	0	0	0	0	1	0	0	0	0	1	0	1	0	IPI00020101.9	126	11.9	1
IPI00025094.3	A1438	DLIDQLGEGGR	MYH16 cDNA: FLJ22037 fis; clone HEP08868 (Fragment)	1	0	1	Group 26	Grp representative					1					1	0	1	0	IPI00025094.3	746	1.47	1
IPI00152871.1	A1438	ASQVECTGAR	LRRC15 Leucine-rich repeat-containing protein 15	1	1	0	Group 102	Grp representative					1					1	0	1	0	IPI00152871.1	581	1.72	1
IPI00218390.1	A1438	VTTVIQNPMPIR	CD22 Isoform CD22-alpha of B-cell receptor CD22	1	1	0	Group 95	Grp representative	0	0	0	0	1	0	0	0	0	1	0	1	0	IPI00218390.1	670	1.79	1
IPI00288940.6	A1438	FIEDVK	OBSCN Isoform 1 of Obscurin	1	1	0	Group 91	Grp representative					1					1	0	1	0	IPI00288940.6	7968	0.08	1
IPI00021033.2	A1434	GPVGPSGPPGK	COL3A1 Isoform 1 of Collagen alpha-1(III) chain	1	0	1	Group 43	Grp representative	0	0	0	1	0	0	0	0	0	1	1	0	0	IPI00021033.2	1466	0.75	1
IPI00654888.4	A1434	GVNVCQETCTK	KLKB1 Plasma kallikrein	1	1	0	Group 92					1						1	1	0	0	IPI00654888.4	638	1.72	1
